# Supplementary material for: Substrate recognition principles for the PP2A-B55 protein phosphatase
Source: PubMed Central journal article supplement — bioRxiv. 2024 Feb 13:2024.02.10.579793. Preprint. [Version 2] doi: 10.1101/2024.02.10.579793 (PMC10871369; doi:10.1101/2024.02.10.579793), 2024-02-13
Supplement: media-1.pdf [file media-1.pdf]

## Overview of supplemental materials

Table S1: AF model scores

Table S2: Mass spectrometry data

Supplemental dataset 1:alphafold models pdb files.

Figure S1: AF score plots and comparison to cryo-EM models.

Figure S2: Validation of novel binders and AF models of distinct binding mechanisms.

Figure S3: CDCA4 data.

Figure S4: IER2 data.

Figure S5: RBM7 data.

Figure S6: PME1 data.

Figure S7: EYA3 data.

Figure S8: AMOTL2 data.

Figure S9: Zds1 data.

Figure S10: E4ORF4 data.

Figure S11: Conservation of SERTA domains.

Figure S12: Volcano plots of MS data.

Figure S13: B55 mutant IPs with CDCA4.

Figure S14: Protein MPNN scores in relation to binding.

Figure S15: SPR data for PME1, Arpp19 and RBM7.

Figure S16: Western blots relating to RBM7 biology and RBM7 SPR data.

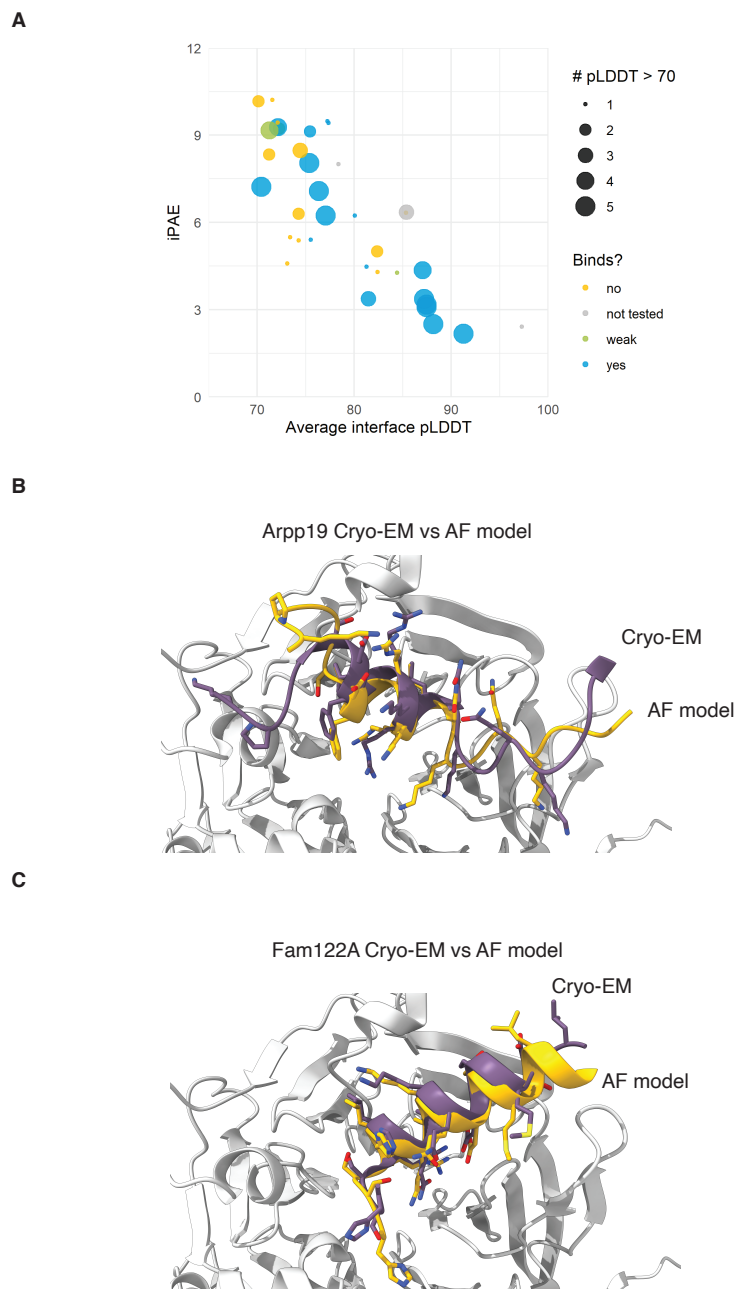

**Supplemental Figure S1.**

**A)** Plot showing iPAE and pLDDT score for the 36 models and whether they were binding to PP2A-B55 in immunoprecipitation experiments. The size of the dot indicates number of models with a pLDDT above 70. **B)** Overlay of the Arpp19 cryo-EM structure (PDB: 8TTB) with the AF model focusing on the helix binding B55. **C)** Overlay of the FAM122A cryo-EM structure (PDB: 8SO0) with the AF model focusing on the helix binding B55.

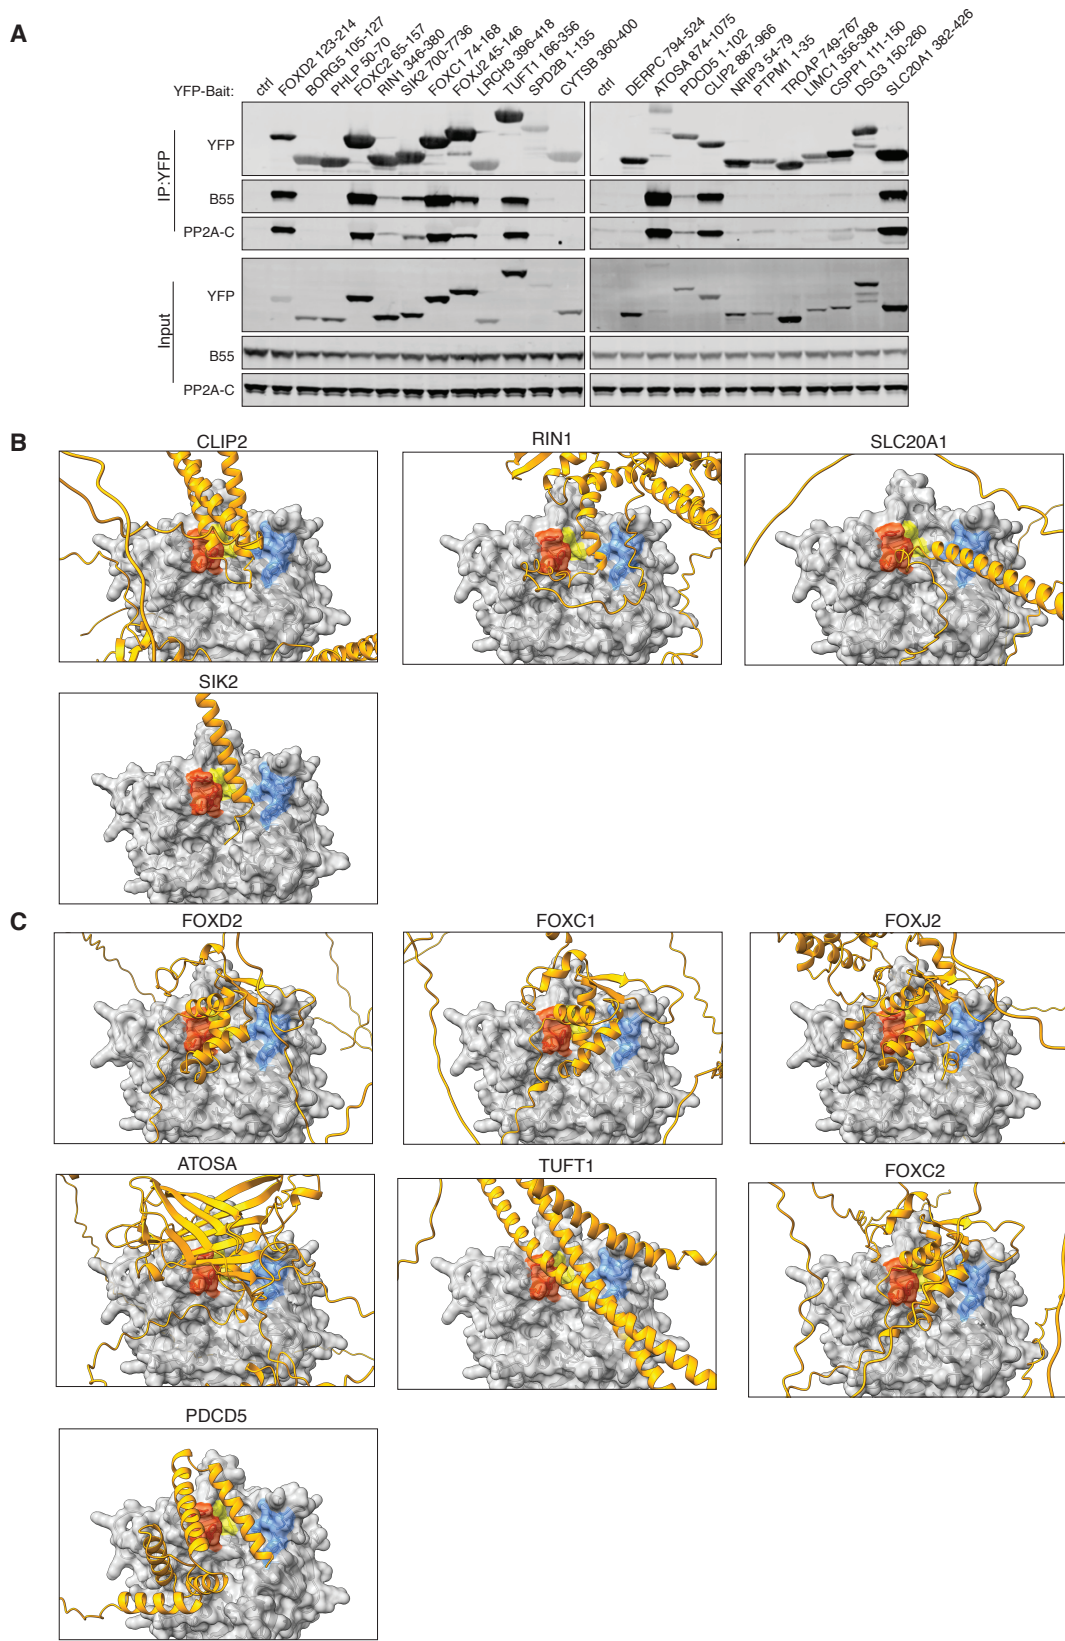

**Supplemental Figure S2**

**A)** The indicated YFP tagged protein fragments were expressed in HeLa cells and following immunoprecipitation they were probed for binding to PP2A-B55 by western blot. **B)** AF models of the indicated proteins binding to PP2A-B55 in a common manner. **C)** AF models of the indicated proteins binding to PP2A-B55 in a distinct manner.

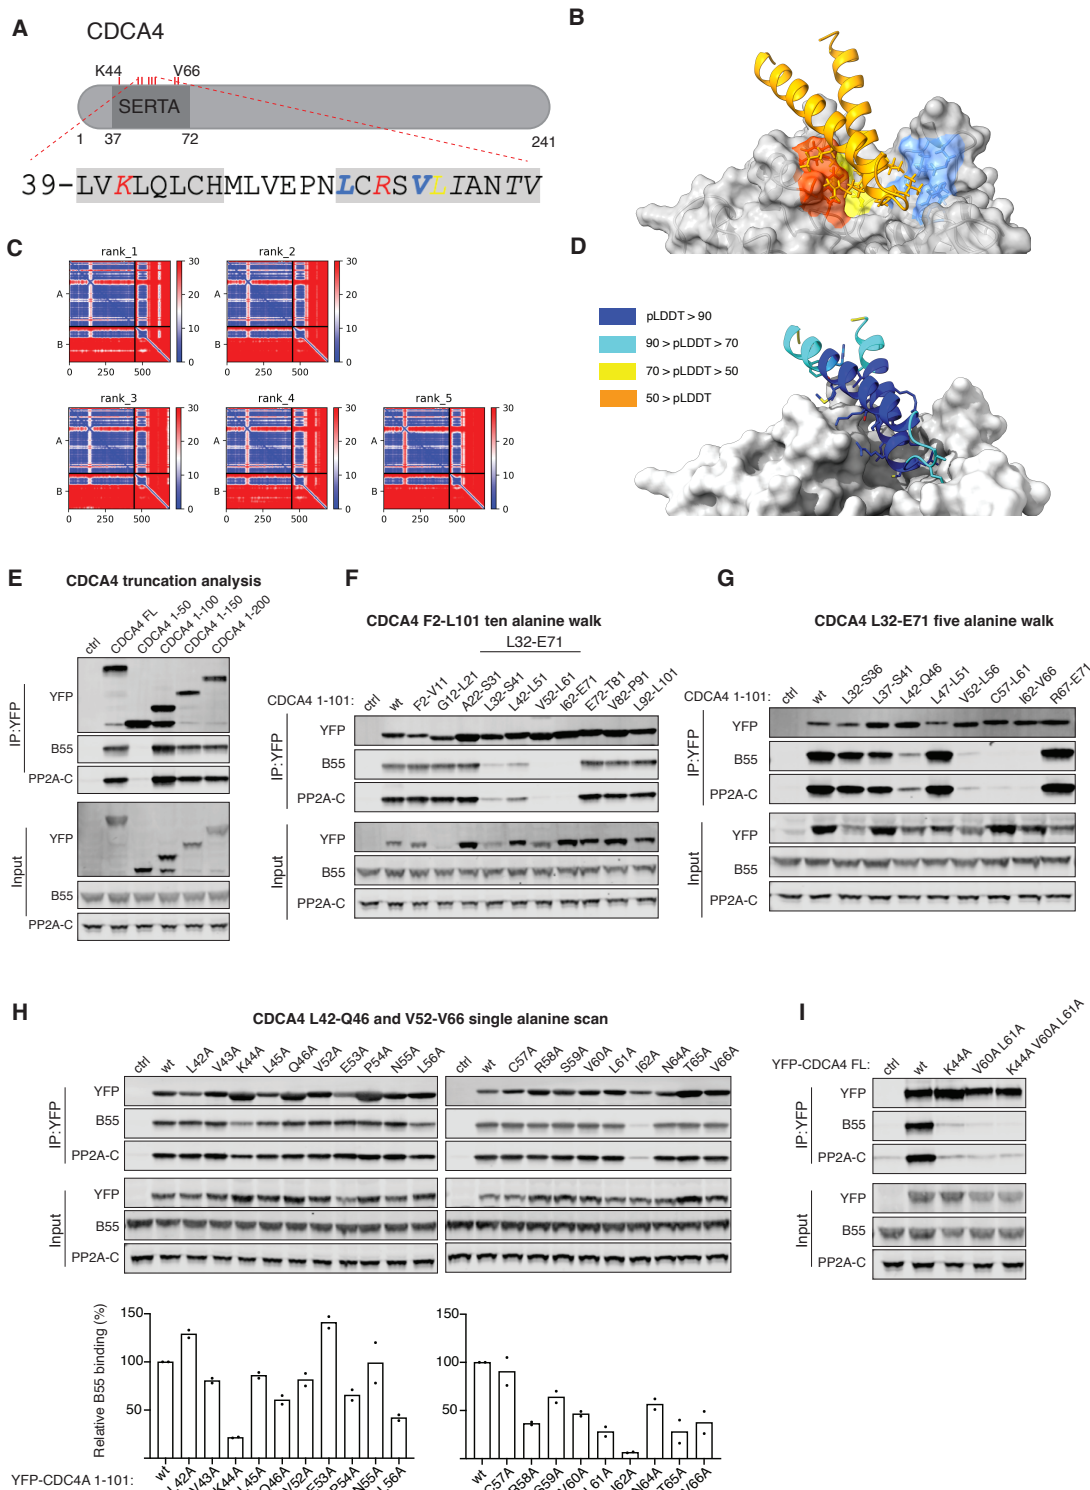

### Supplemental Figure S3

**A)** Schematic of CDCA4 and sequence binding PP2A-B55. **B)** AF model of CDCA4 bound to B55. **C)** Prediction aligned error (PAE) score for the 5 models. **D)** pLDDT score mapped onto model. **E-I)** The indicated YFP tagged protein fragments were expressed in HeLa cells and following immunoprecipitation they were probed for binding to PP2A-B55 by western blot. In **H)** the quantification of two experiments is shown with binding normalized to wild type protein.

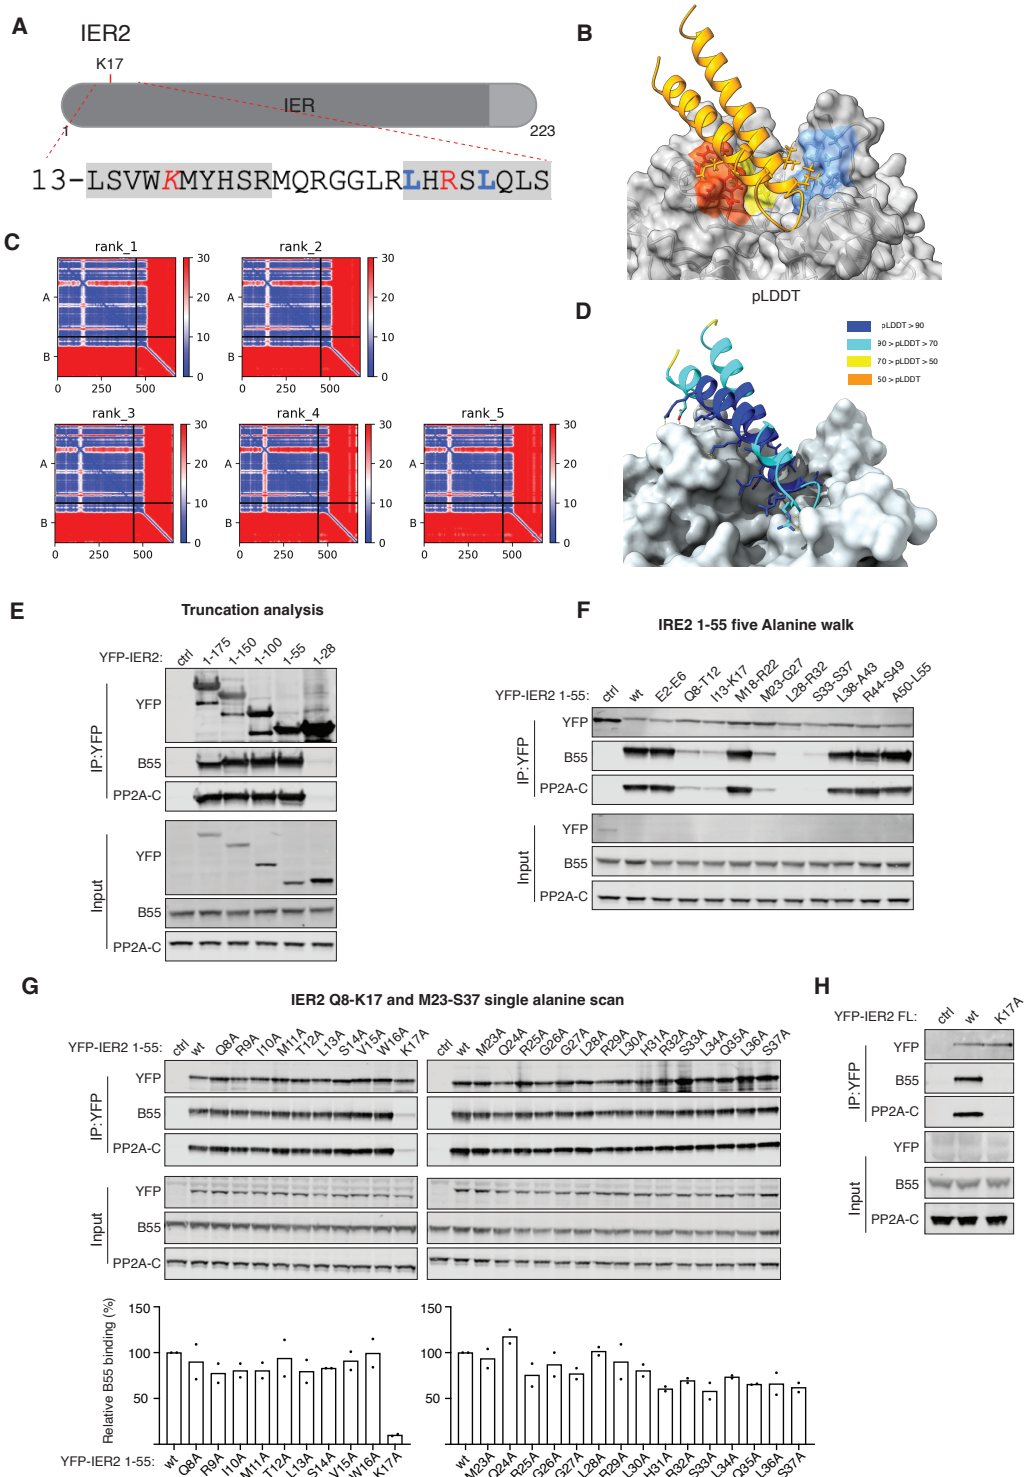

### Supplemental Figure S4

**A)** Schematic of IER2 and sequence binding PP2A-B55. **B)** AF model of IER2 bound to B55. **C)** Prediction aligned error (PAE) score for the 5 models. **D)** pLDDT score mapped onto model. **E-H)** The indicated YFP tagged protein fragments were expressed in HeLa cells and following immunoprecipitation they were probed for binding to PP2A-B55 by western blot.

In G) the quantification of two experiments is shown with binding normalized to wild type protein.

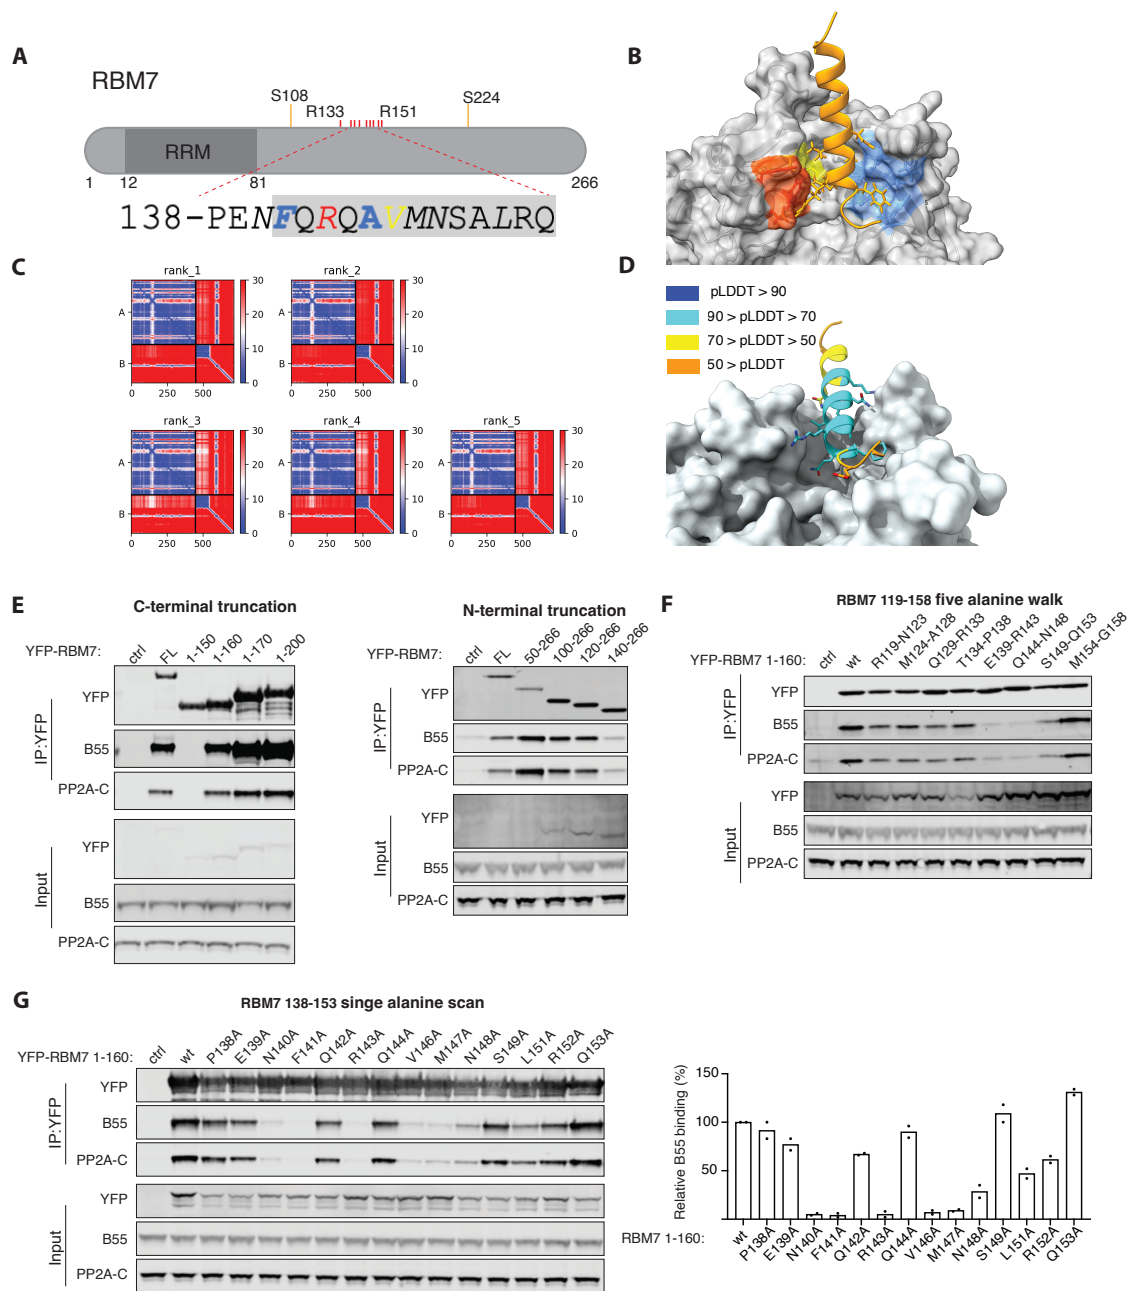

### Supplemental Figure S5

**A)** Schematic of RBM7 and sequence binding PP2A-B55. Phosphorylation sites with higher occupancy in RBM7 R143A indicated. **B)** AF model of RBM7 bound to B55. **C)** Prediction aligned error (PAE) score for the 5 models. **D)** pLDDT score mapped onto model. **E-H)** The indicated YFP tagged protein fragments were expressed in HeLa cells and following immunoprecipitation they were probed for binding to PP2A-B55 by western blot. In H) the quantification of two experiments is shown with binding normalized to wild type protein.

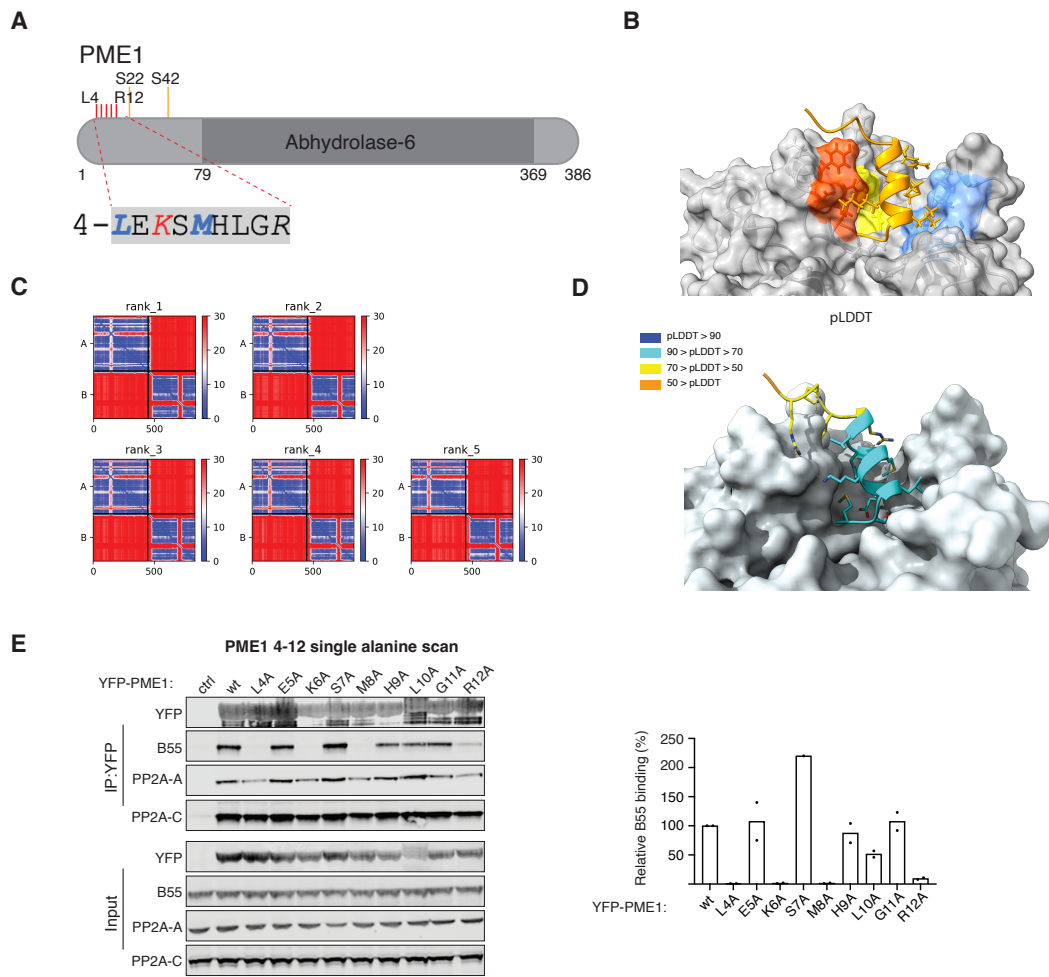

### Supplemental Figure S6

**A)** Schematic of PME1 and sequence binding PP2A-B55. Phosphorylation sites with higher occupancy in PME1 L4A indicated. **B)** AF model of PME1 binding helix bound to B55. **C)** Prediction aligned error (PAE) score for the 5 models. **D)** pLDDT score mapped onto model. **E)** The indicated YFP tagged proteins were expressed in HeLa cells and following immunoprecipitation they were probed for binding to PP2A-B55 by western blot. The quantification of two experiments is shown with binding normalized to wild type protein.

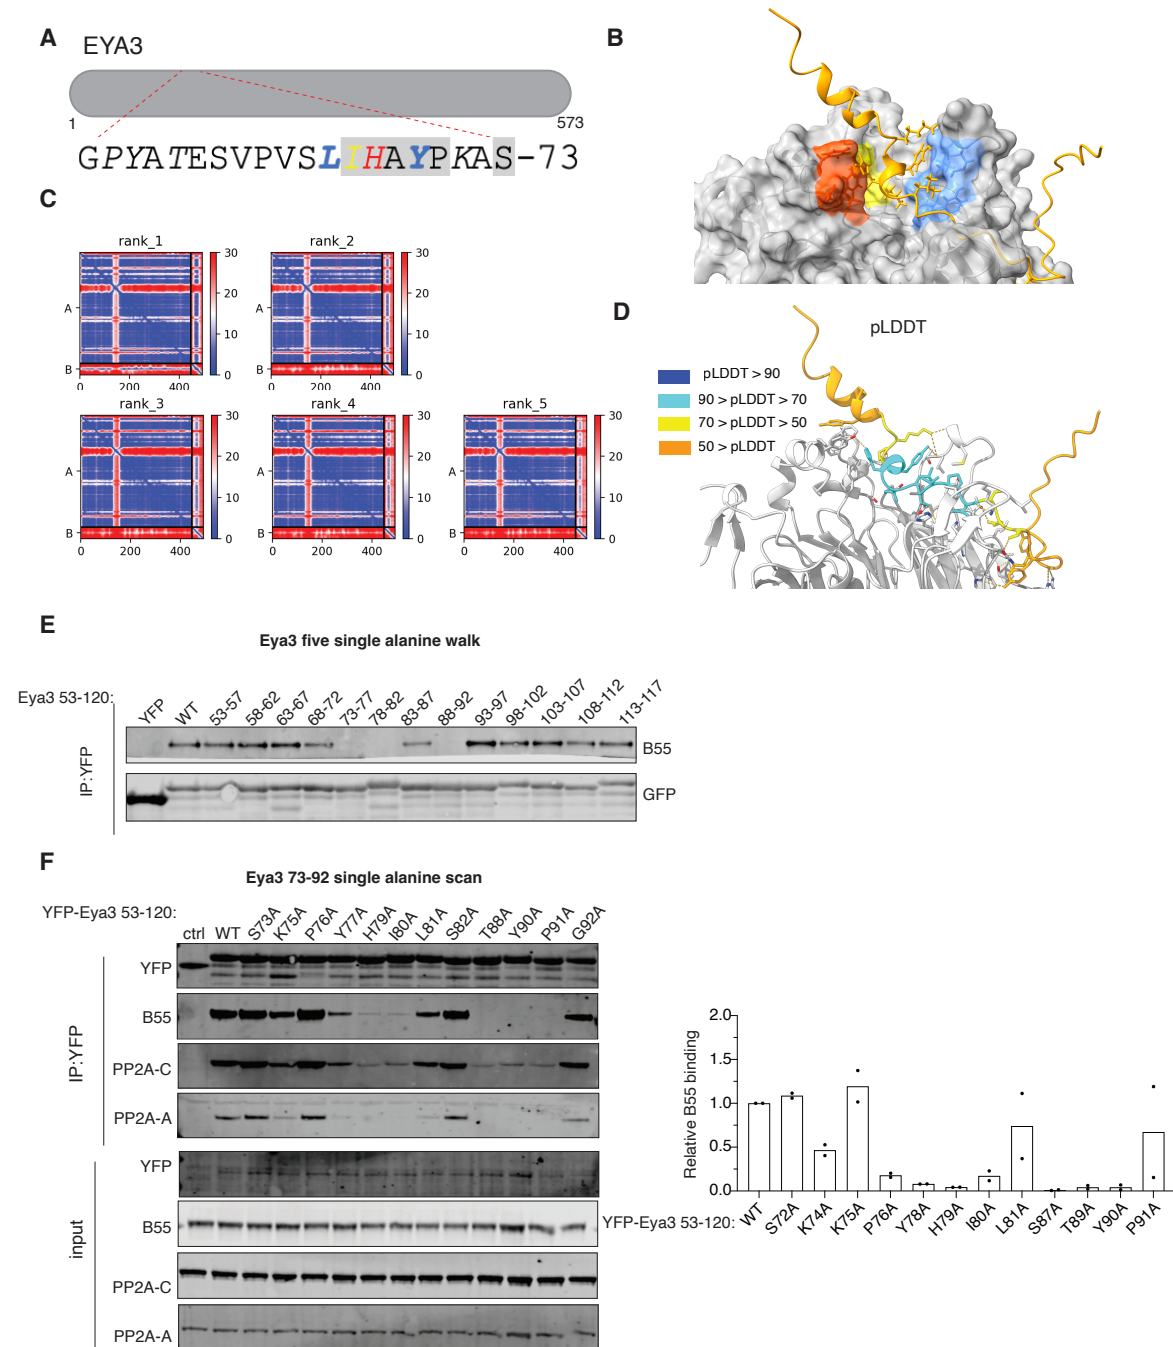

### Supplemental Figure S7

**A)** Schematic of EYA3 and sequence binding PP2A-B55. **B)** AF model of EYA binding helix bound to B55. **C)** Prediction aligned error (PAE) score for the 5 models. **D)** pLDDT score mapped onto model. **E-F)** The indicated YFP tagged protein fragments were expressed in HeLa cells and following immunoprecipitation they were probed for binding to PP2A-B55 by western blot. In F) the quantification of two experiments is shown with binding normalized to wild type protein.



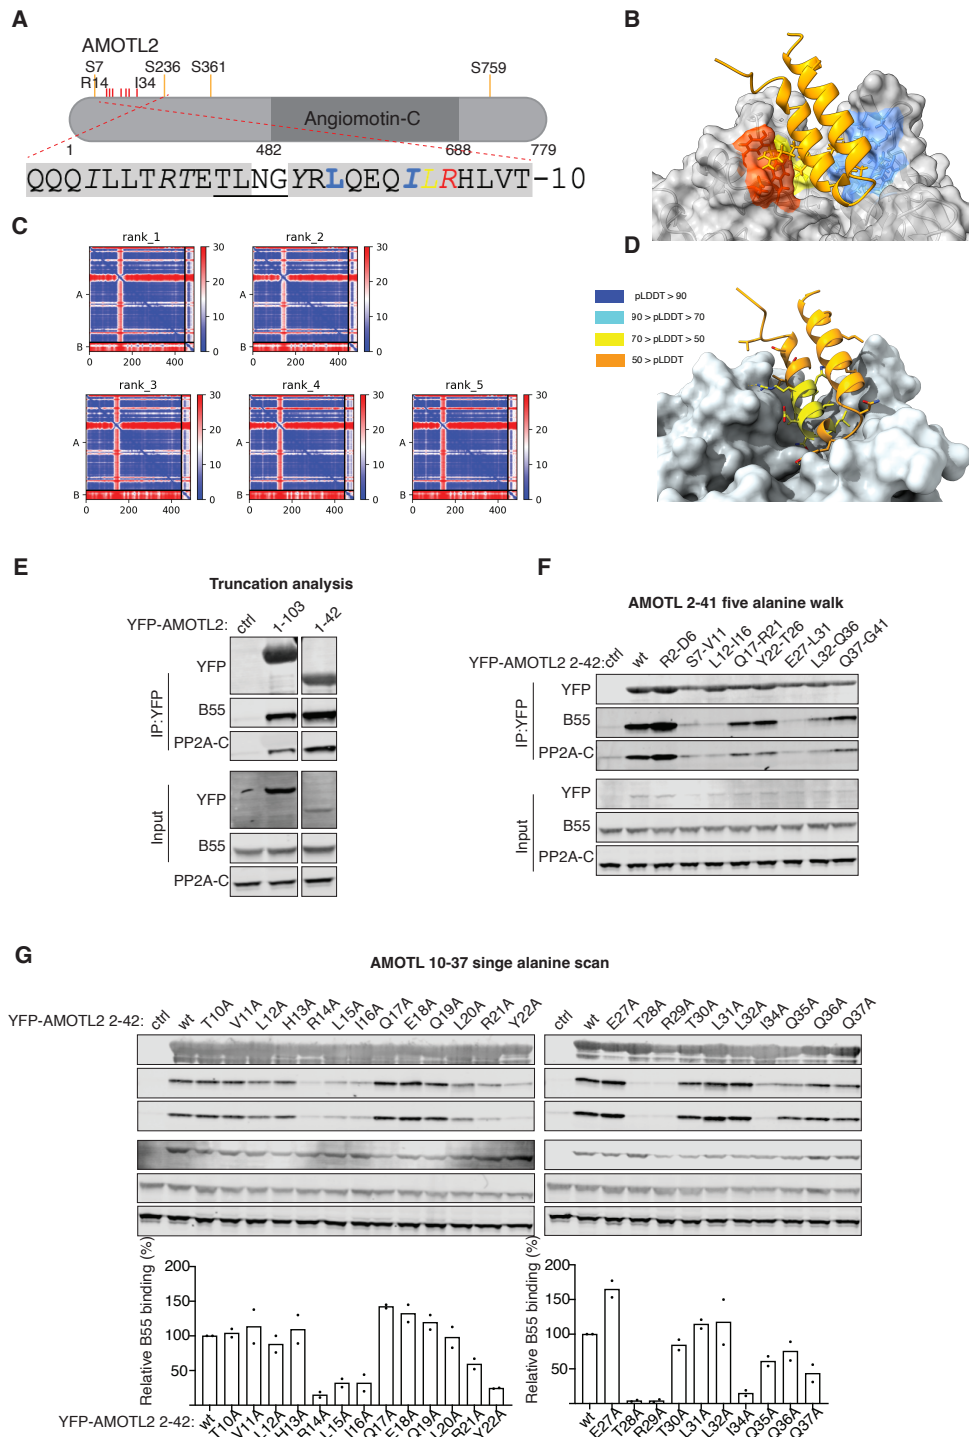

## Supplemental Figure S8

**A)** Schematic of AMOTL2 and sequence binding PP2A-B55. Phosphorylation sites with higher occupancy in AMOTL2 T28A/R29A indicated **B)** AF model of AMOTL2 bound to B55. **C)** Prediction aligned error (PAE) score for the 5 models. **D)** pLDDT score mapped onto model. **E-I)** The indicated YFP tagged protein fragments were expressed in HeLa cells and following immunoprecipitation they were probed for binding to PP2A-B55 by western blot. In H) the quantification of two experiments is shown with binding normalized to wild type protein.

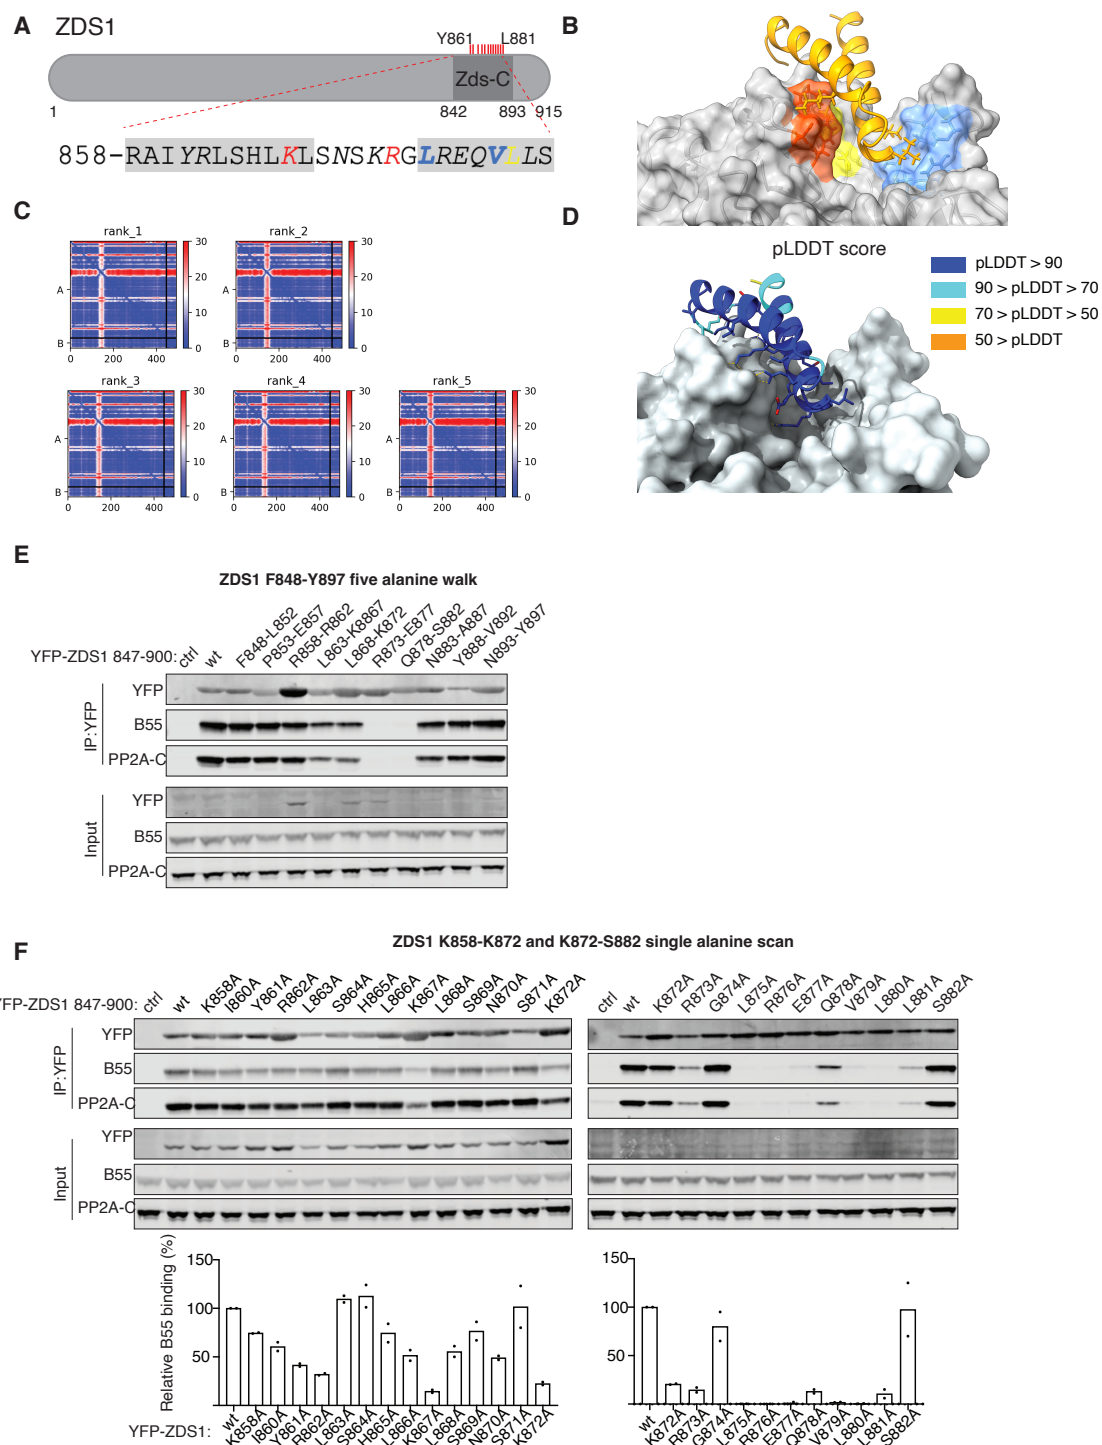

## Supplemental Figure S9

**A)** Schematic of Zds1 and sequence binding PP2A-B55. **B)** AF model of Zds1 binding helices bound to B55. **C)** Prediction aligned error (PAE) score for the 5 models. **D)** pLDDT score mapped onto model. **E-F)** The indicated YFP tagged protein fragments were expressed in HeLa cells and following immunoprecipitation they were probed for binding to PP2A-B55 by western blot. In F) the quantification of two experiments is shown with binding normalized to wild type protein.

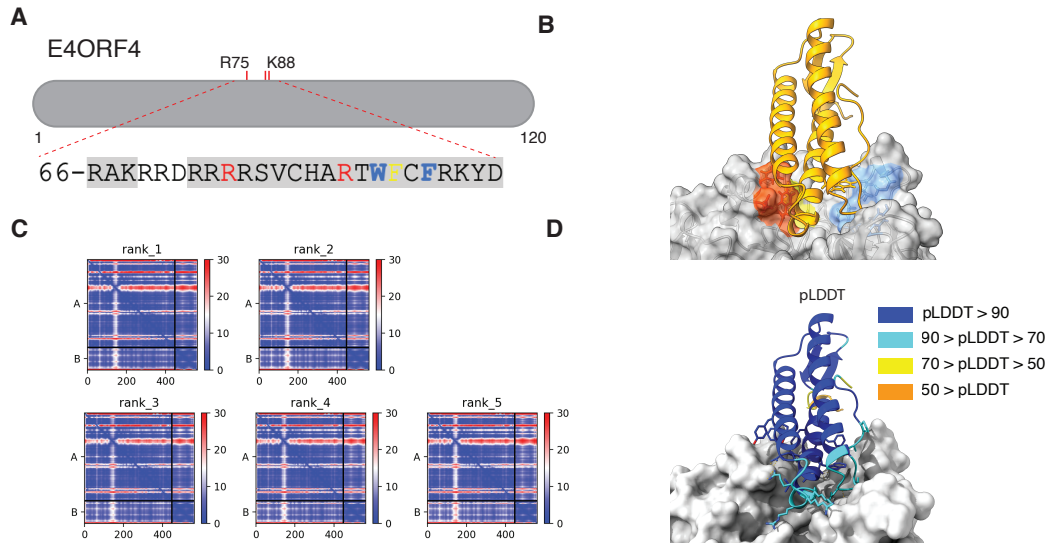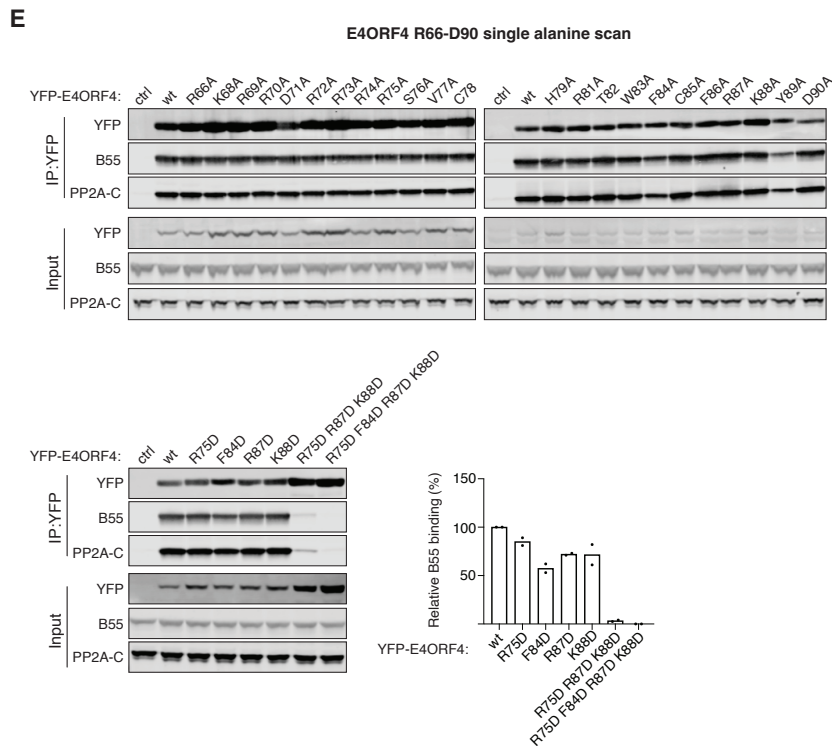

### Supplemental Figure S10

**A)** Schematic of E4ORF4 and sequence binding PP2A-B55. **B)** AF model of E4ORF4 bound to B55. **C)** Prediction aligned error (PAE) score for the 5 models. **D)** pLDDT score mapped onto model. **E)** The indicated YFP tagged protein fragments were expressed in HeLa cells and following immunoprecipitation they were probed for binding to PP2A-B55 by western blot. **E)** Bottom panel the quantification of two experiments is shown with binding normalized to wild type protein.

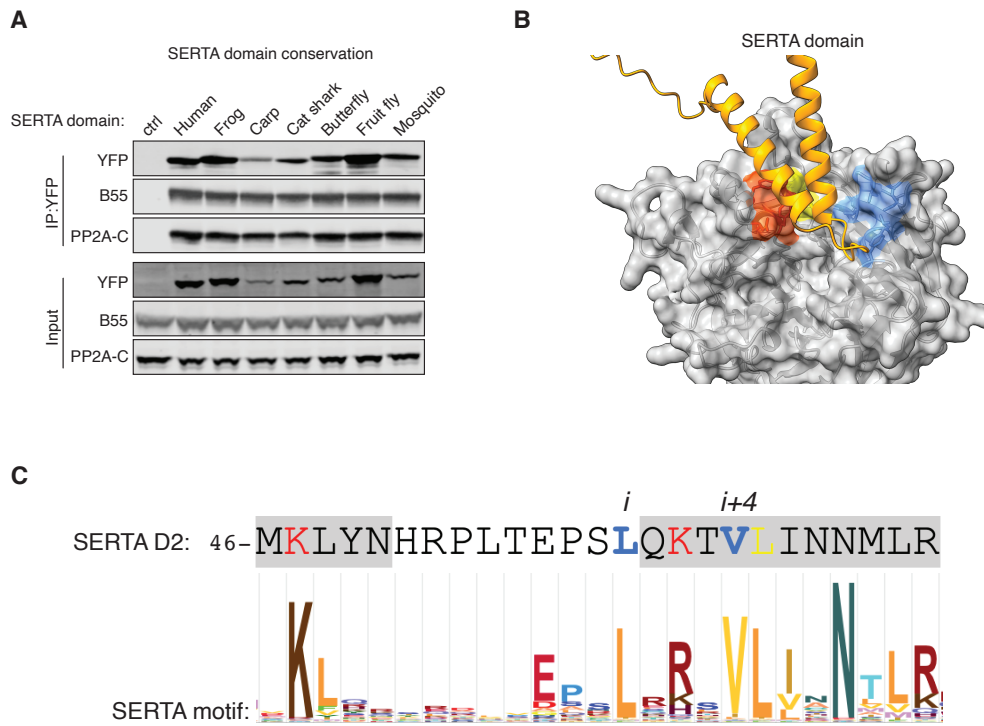

### Supplemental Figure S11

**A)** YFP tagged SERTA domains from different species were expressed in HeLa cells and binding to PP2A-B55 determined by western-blot. **B)** AF model of the CDCA4 SERTA domain bound to B55. **C)** Signature of all SERTA domains in the pfam database showing conservation of key residues (data from pfam 06031)

**A**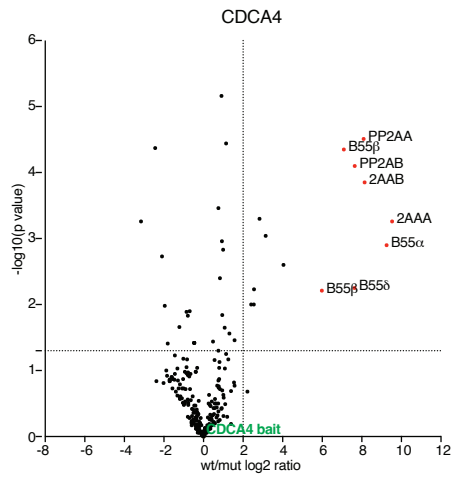**B**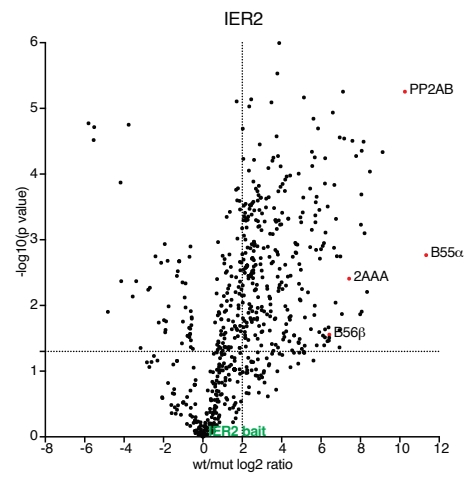**C**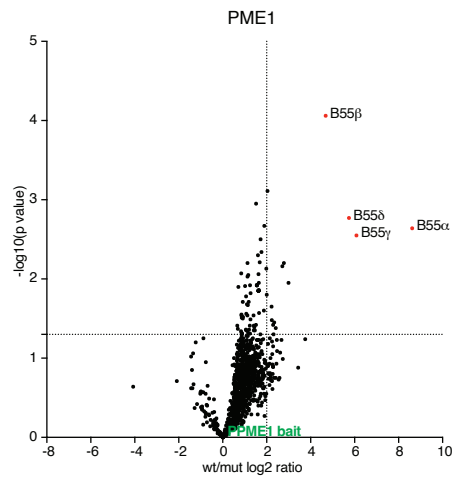**D**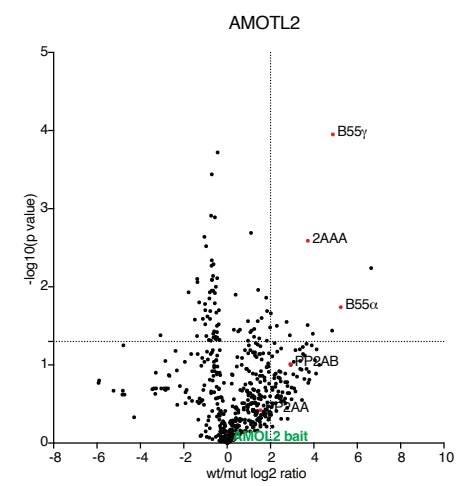

### Supplemental Figure S12

**A-D)** Volcano plots of mass spectrometry analysis of immunoprecipitations (n=4) of the indicated proteins comparing wild type to B55 mutant. PP2AA/B: catalytic subunit, 2AAA: scaffold subunit.

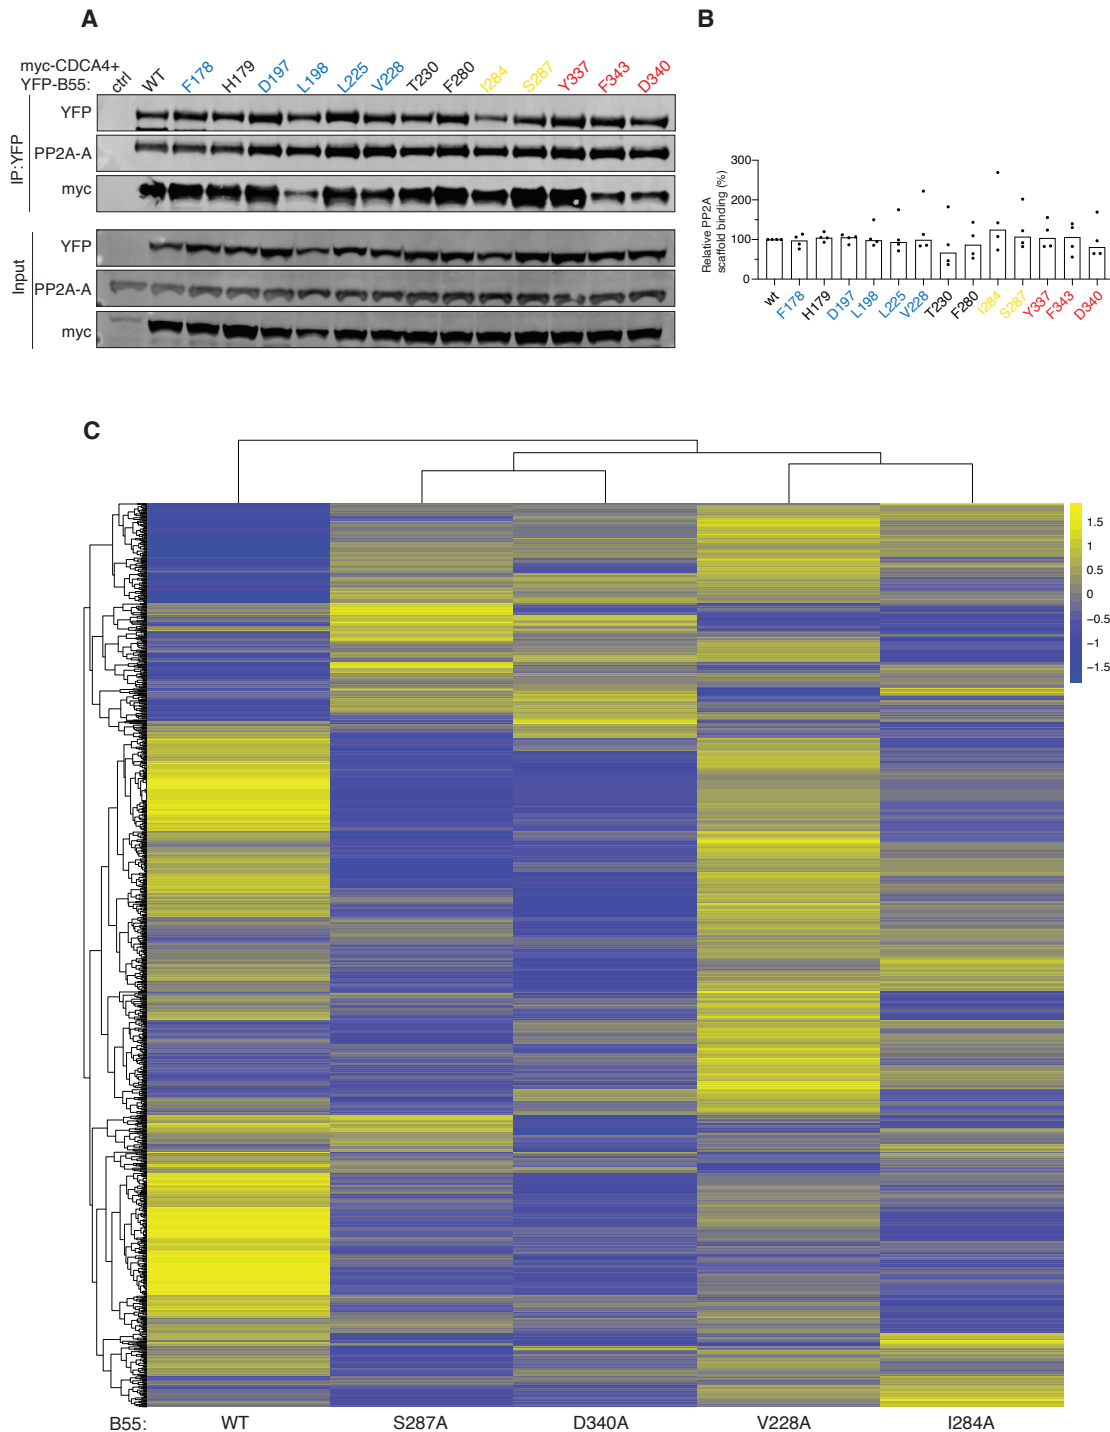

### Supplemental Figure S13

**A)** Immunoprecipitation of indicated YFP-B55 tagged mutants and binding to myc-CDCA4 determined by western blot **B)** Quantification to relative binding of PP2A scaffold to B55 mutants; median shown, n=4. **C)** HEAT map relating to Figure 2 showing all proteins identified by mass spectrometry in the different B55 variants. Scale bar is log<sub>2</sub> and n=4.

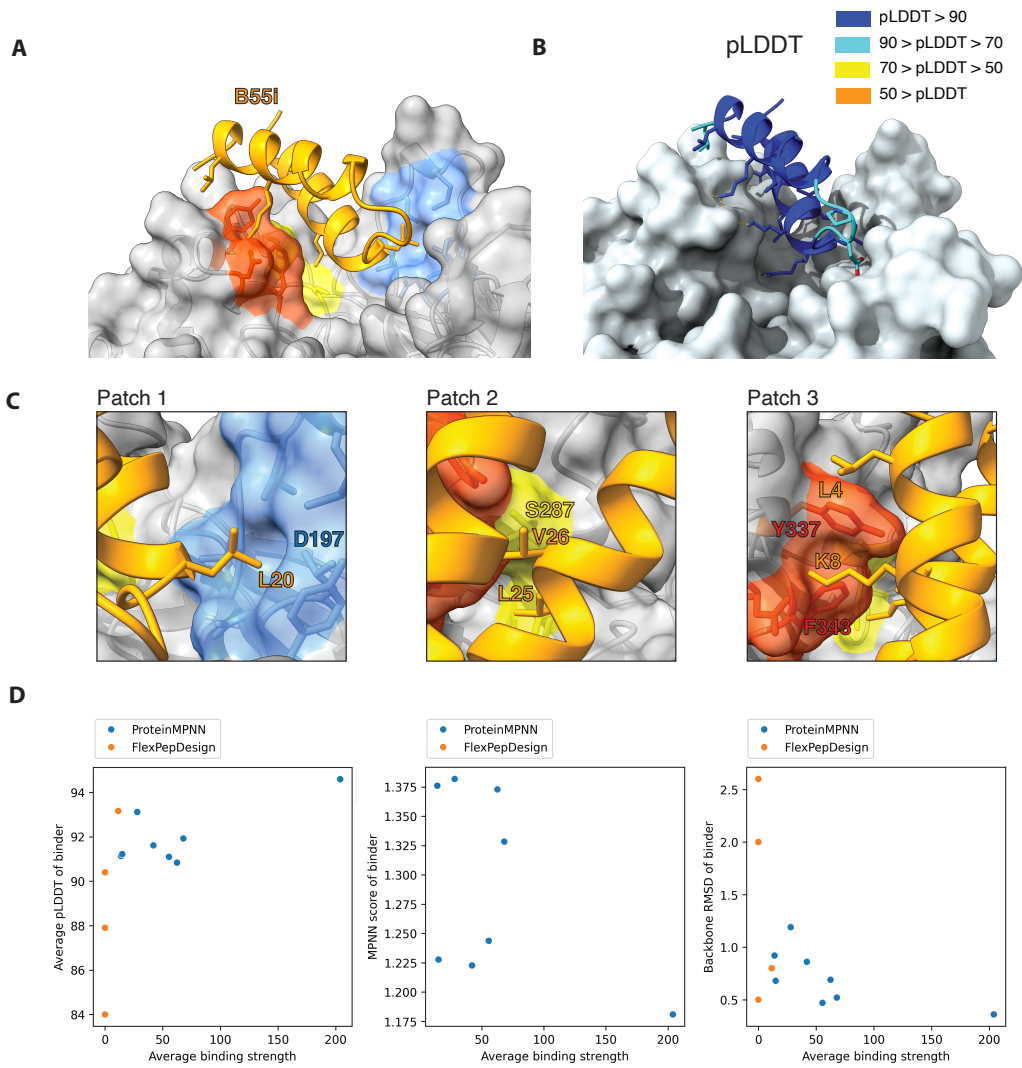

### Supplemental Figure S14

**A-B)** AF model of B55i bound to B55 and pLDDT score. **C)** Zoom in on interactions of B55i with the different patches. **D)** Plots of design scores and binding strength based on immunoprecipitations from HeLa cells of YFP tagged de novo B55 binders.

**D**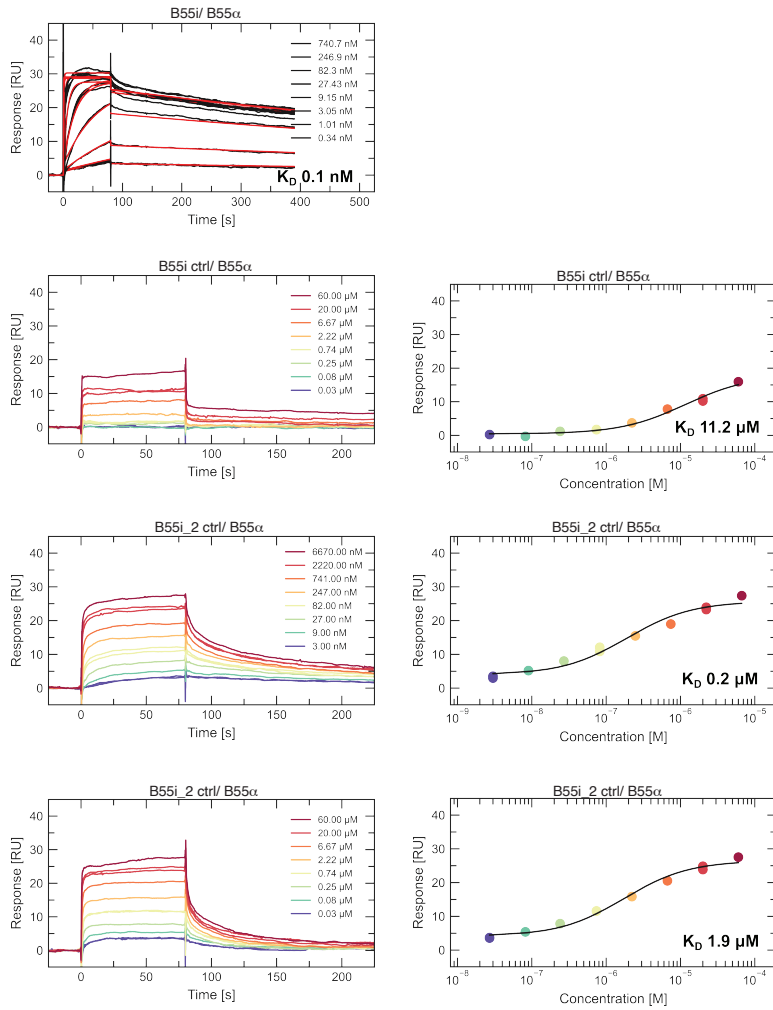**E**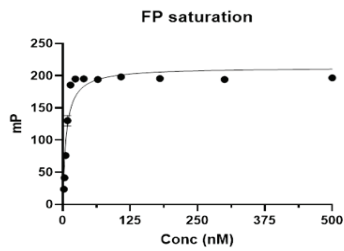**F**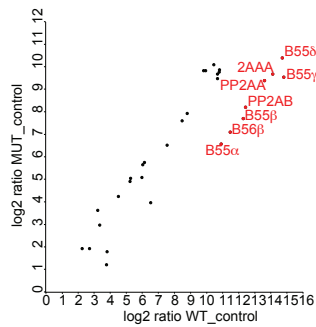**Supplemental Figure S14-continued**

**D)** SPR data for B55i-1 and B55i-2 peptides binding to B55. **E)** FP measurements for B55i (n=3). **F)** Mass spectrometry analysis of B55i and B55i CTRL based on n=4.



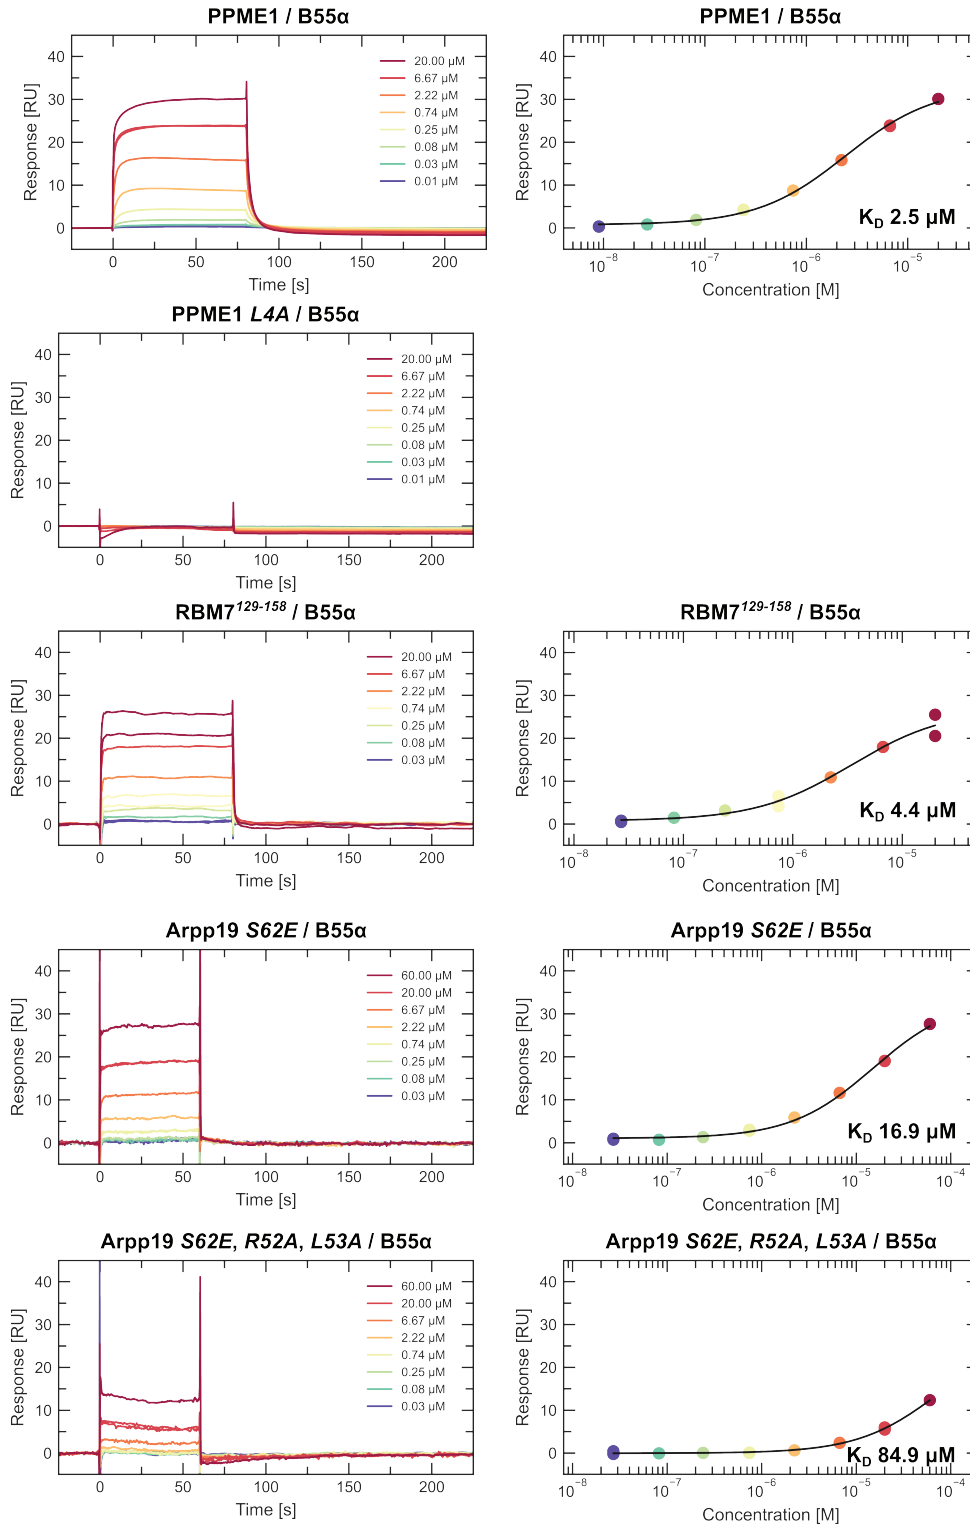

**Supplemental Figure S15**  
 SPR data for the indicated proteins binding to B55.

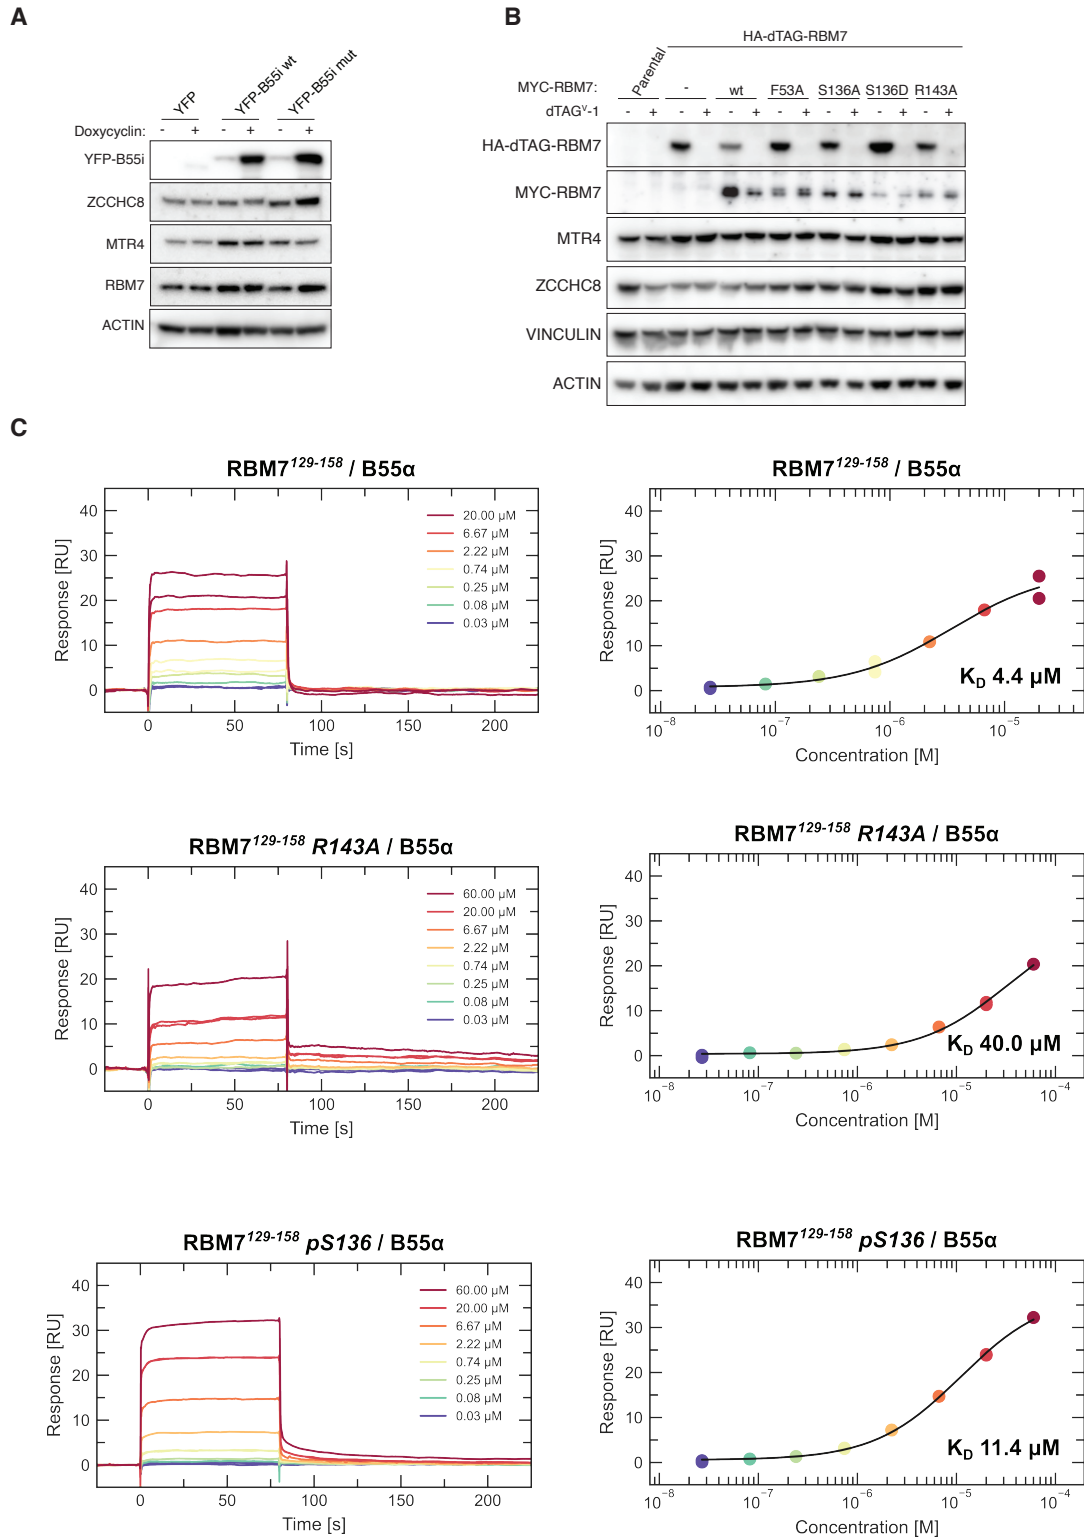

### Supplemental Figure S16

**A)** Western blots of B55i expression from inducible HeLa cells. **B)** Removal of HA-dTAG-RBM7 with dTAG-1 and complementation with myc-RBM7 variants. **C)** SPR data for the indicated RBM7 peptides binding to B55.
